# Supplementary material
Source: Springer Nature journal article supplement (https://www.springermedizin.de/resource/supplementary/12889_2010_2440_MOESM4_ESM.pdf/9485860)

Proportion of cost to total annual cost

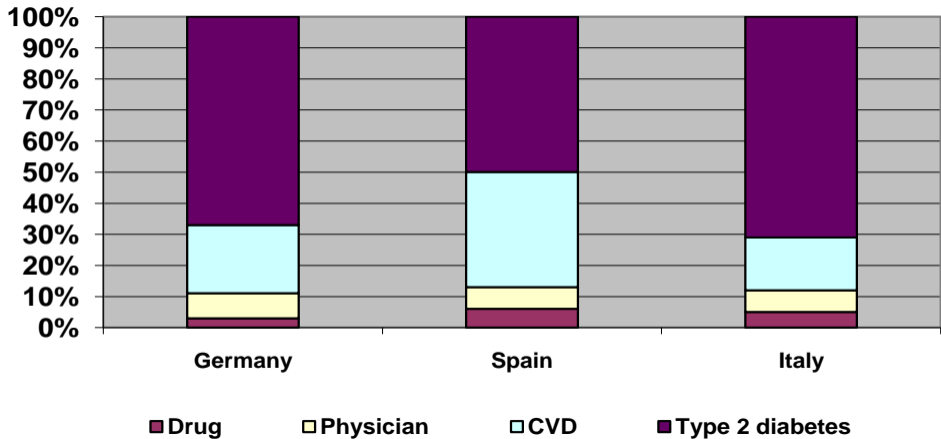

Supplement: MOESM4 [file 9485860]
